# Supplementary material for: New Waterborne Polyurethane-Urea Synthesized with Ether-Carbonate Copolymer and Amino-Alcohol Chain Extenders with Tailored Pressure-Sensitive Adhesion Properties
Source: PubMed Central journal article supplement (PMC7040638; doi:10.3390/ma13030627), 2020-01-31
Supplement: materials-13-00627-s001.pdf [file materials-13-00627-s001.pdf]

Article

# New Waterborne Polyurethane-Urea Synthesized with Ether-Carbonate Copolymer and Amino-Alcohol Chain Extenders with Tailored Pressure-Sensitive Adhesion Properties

Mónica Fuensanta <sup>1</sup>, Abbas Khoshnood <sup>1</sup>, Francisco Rodríguez-Llansola <sup>2</sup> and José Miguel Martín-Martínez <sup>1,\*</sup>

<sup>1</sup> Adhesion and Adhesive Laboratory, University of Alicante, 03080 Alicante, Spain; monica.fuensanta@ua.es (M.F.); abbas.khoshnood@ua.es (A.K.)

<sup>2</sup> UBE Corporation Europe, Polígono El Serrallo, 12100 Grao Castellón, Spain; f.rodriquez@ube.com

\* Correspondence: jm.martin@ua.es; Tel.: +34-9-6590-3977; Fax: +34-9-6590-9416

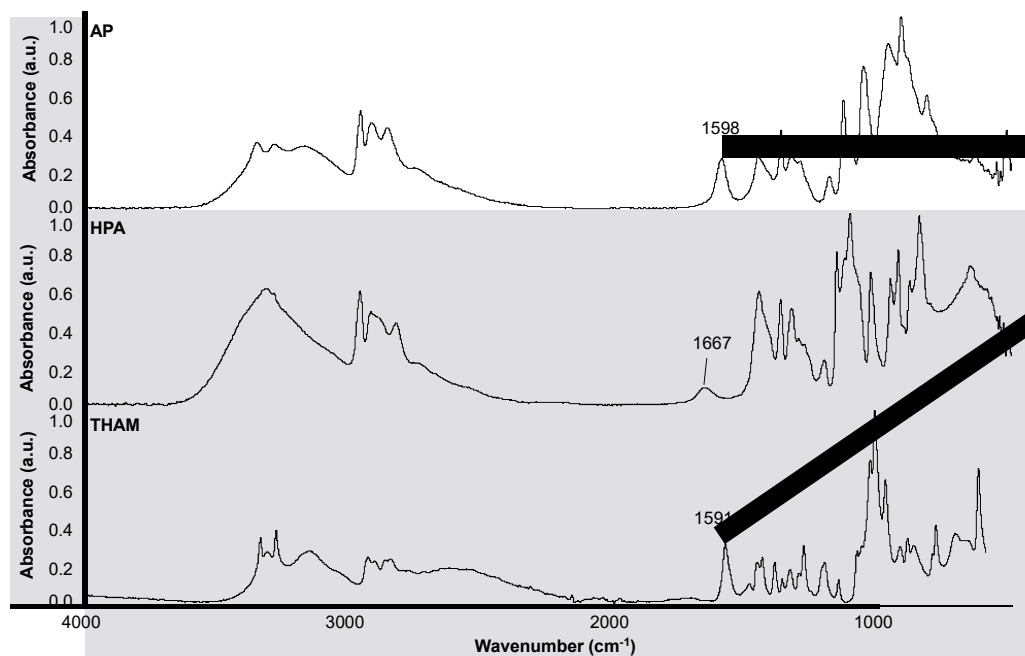

Figure 1. ATR-IR spectra of the amino-alcohol chain extenders.
